# Supplementary material for: Composition-Based Risk Estimation of Mycotoxins in Dry Dog Foods
Source: MDPI journal article supplement (doi:10.3390/foods12010110), 2022-12-25
Supplement: s1 [file s1]

## Supplementary materials

# Composition-Based Risk Estimation of Mycotoxins in Dry Dog Foods

Ovidiu Ionut Geicu <sup>1,†</sup>, Liviu Bilteanu <sup>1,2,†</sup>, Loredana Stanca <sup>1</sup>, Adriana Ionescu Petcu <sup>1</sup>, Florin Iordache <sup>1</sup>, Aurelia Magdalena Pisoschi <sup>1</sup> and Andreea Iren Serban <sup>1,3,\*</sup>

<sup>1</sup> Department of Preclinical Sciences, Faculty of Veterinary Medicine, University of Agronomic Sciences and Veterinary Medicine of Bucharest, 105 Blvd. Splaiul Independentei, 050097 Bucharest, Romania

<sup>2</sup> Molecular Nanotechnology Laboratory, National Institute for Research and Development in Microtechnologies, 126A, Erou Iancu Nicolae Street, 077190 Bucharest, Romania

<sup>3</sup> Department of Biochemistry and Molecular Biology, Faculty of Biology, University of Bucharest, 91–95 Blvd. Splaiul Independentei, 050095, Bucharest, Romania

\* Correspondence: irensro@yahoo.com; Tel.: +40-021-3180469; Fax: +40-021-3180498

† These authors contributed equally to this work.

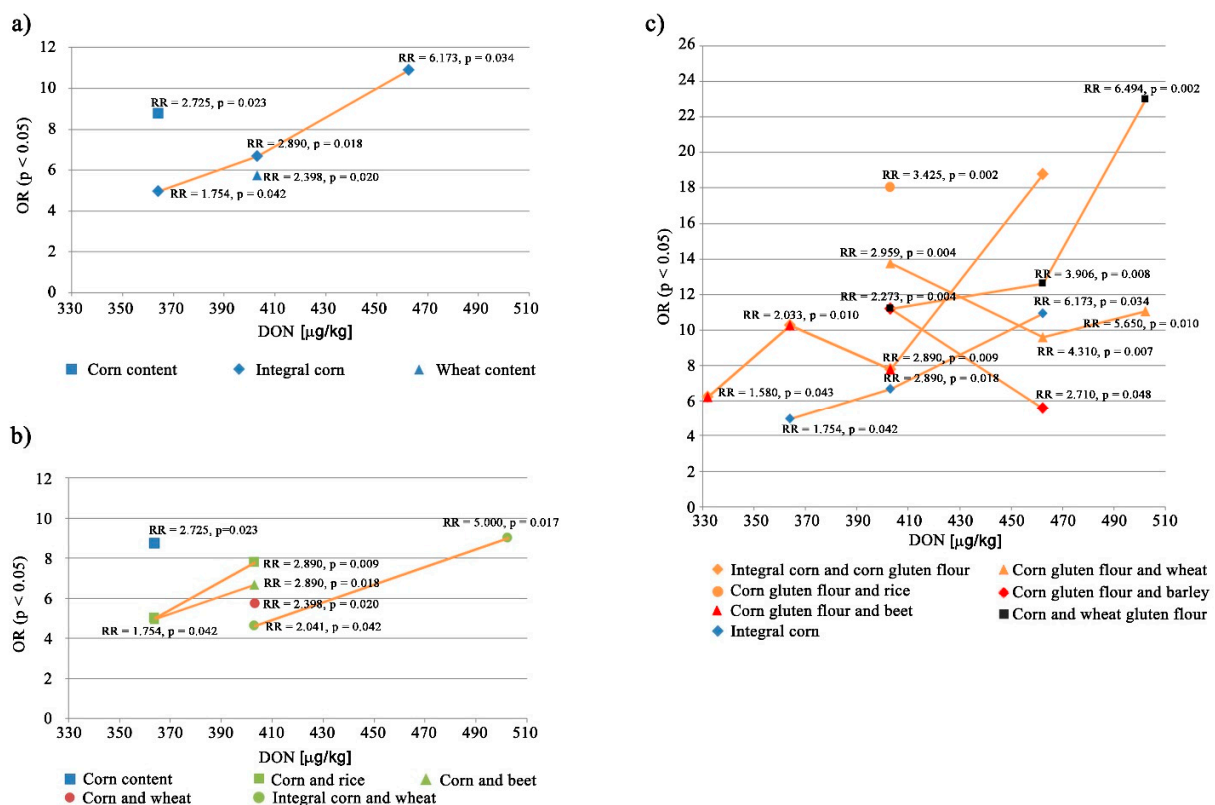

**Figure S1.** Association levels of ingredients or combinations of ingredients with DON levels above the threshold values,  $t_1^{\alpha}$ : (a) corn, integral corn, and wheat; (b) combinations of corn with other ingredients; (c) combinations of corn or wheat gluten flour with other ingredients. We kept the integral corn for reference in (b) and (c).

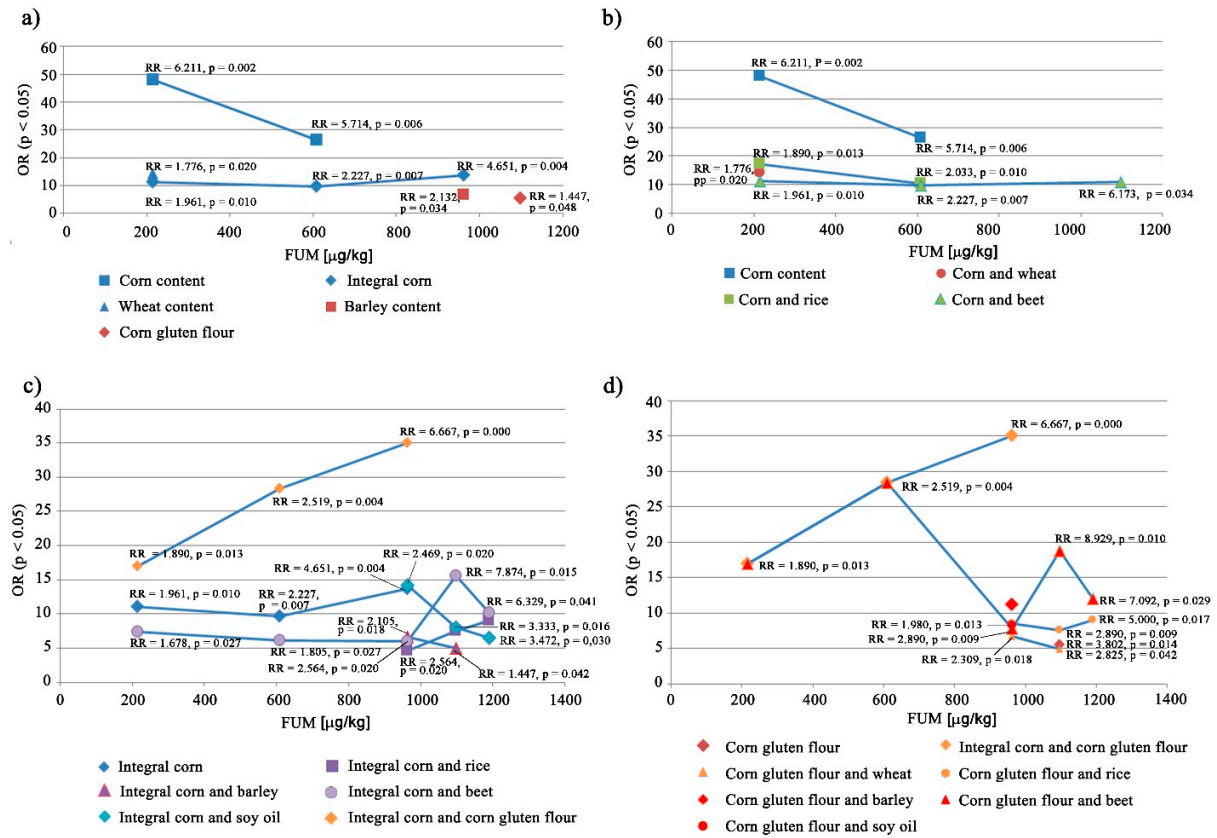

**Figure S2.** Association levels of ingredients or combinations of ingredients with FUM levels above the threshold values,  $t_2^{\alpha}$ : (a) corn, integral corn, wheat, barley, and corn gluten flour; (b) combinations of corn with other ingredients; (c) combinations of integral corn with other ingredients; (d) combinations of corn gluten flour with other ingredients. We added the corn, the integral corn, and corn gluten flour for reference in (b), (c), and (d), respectively.

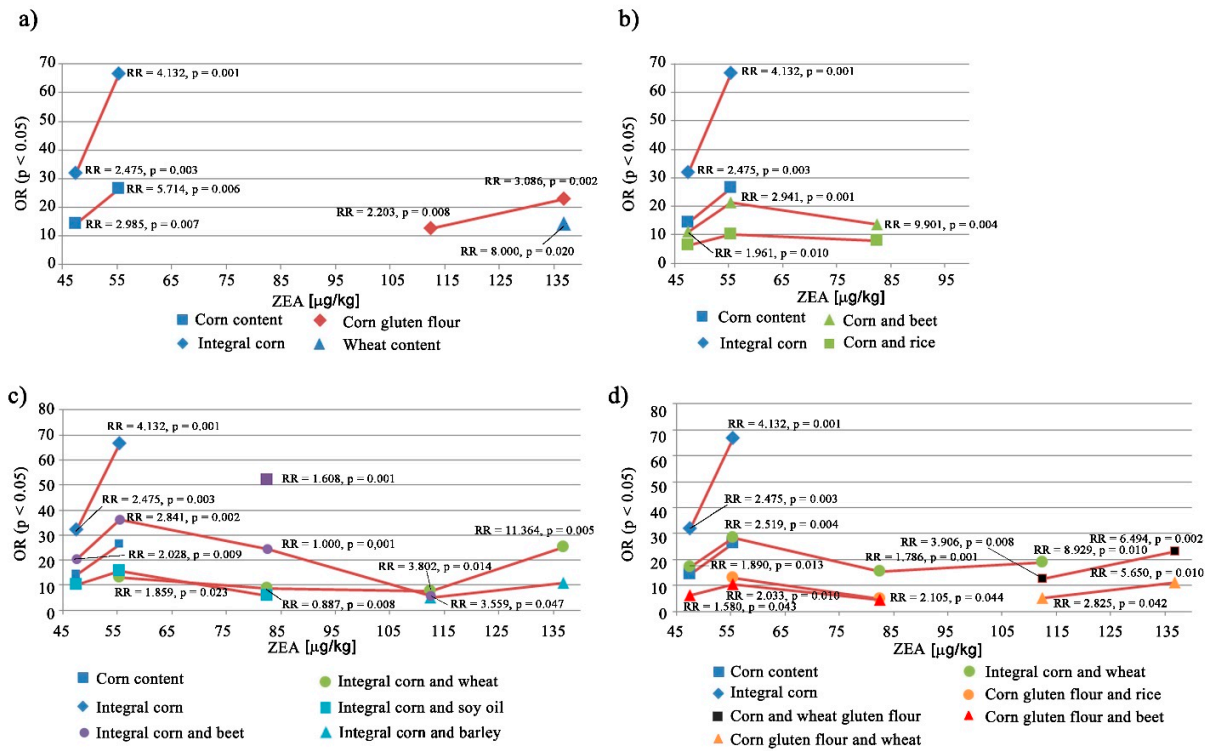

**Figure S3.** Association levels of ingredients or combinations of ingredients with ZEA levels above the threshold values,  $t_3^a$ : (a) corn, integral corn, wheat, and corn gluten flour; (b) combinations of corn with other ingredients; (c) combinations of integral corn with other ingredients; (d) combinations of corn or wheat gluten flour with other ingredients. We added the corn and the integral corn for reference in (b), (c), and (d).

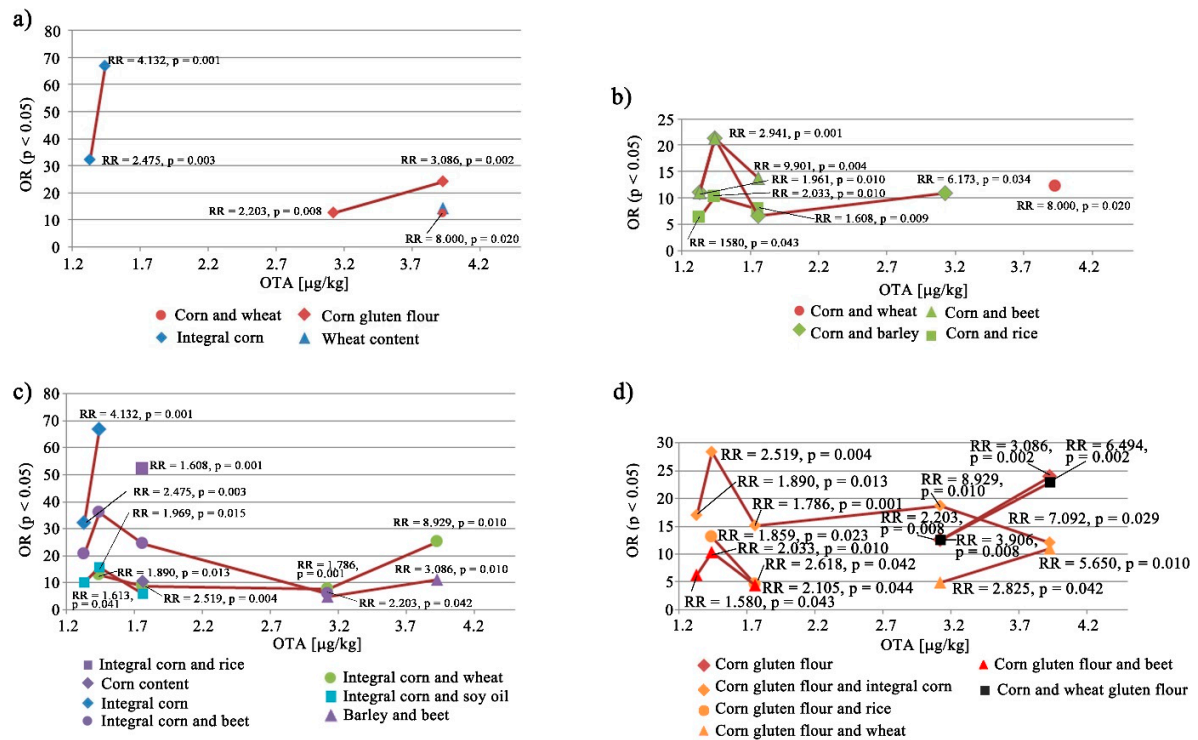

**Figure S4.** Association levels of ingredients or combinations of ingredients with OTA levels above the threshold values,  $t_4^a$ : (a) integral corn, wheat, corn and wheat and corn gluten flour; (b) combinations of corn with other ingredients; (c) combinations of integral corn with other ingredients; (d) combinations of corn or wheat gluten flour with other ingredients. We added the corn and the integral corn for reference in (c).

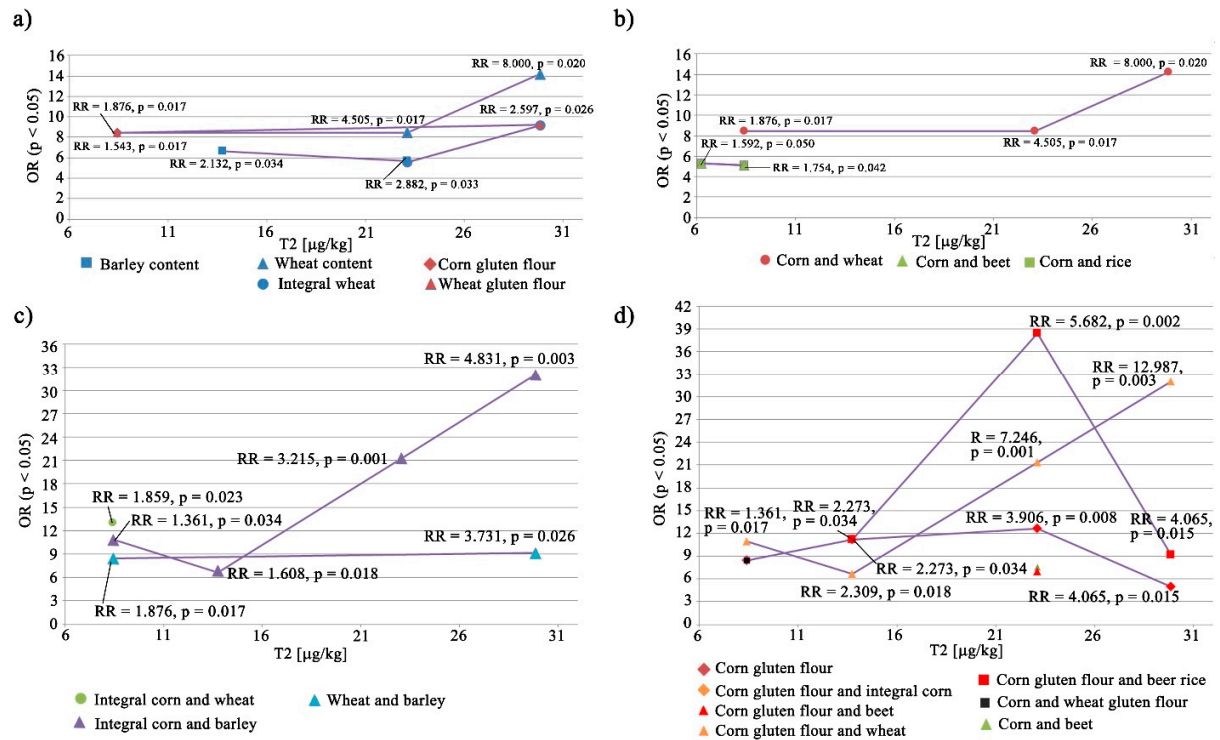

**Figure S5.** Association levels of ingredients or combinations of ingredients with T2 levels above the threshold values,  $t_5^a$ : (a) integral corn, wheat, integral wheat, barley, corn and wheat gluten flour; (b) combinations of corn with other ingredients; (c) combinations of integral corn with other ingredients; (d) combinations of corn or wheat gluten flour with other ingredients.
